# Supplementary material for: Research Note—Cloud Computing Spot Pricing Dynamics: Latency and Limits to Arbitrage
Source: Atypon-hosted journal article supplement (doi:10.1287/isre.2015.0608), 2016-02-18
Supplement: isre.2015.0608-sm_appendix_additional_results.pdf [file isre.2015.0608-sm_appendix_additional_results.pdf]

**Appendix: Additional Results**  
**Cloud Computing Spot Pricing Dynamics: Latency and Limits to Arbitrage**

May 3, 2015

# Price Differential Regression Results: Alternative Instances Examples

In this set of results, we provide additional robustness checks using alternative instance types. The results reported below across numerous instance types further confirm the significance of latency differentials on west-east price differentials. Below we report the instance types in parentheses corresponding to each set of regression results. Footnotes 7-9 in the manuscript provide a description of Amazon EC2 instance types.

## Price Differential Regressions (C1.medium)

|           | Windows            |                      | Linux/Unix          |                     |
|-----------|--------------------|----------------------|---------------------|---------------------|
|           | Model 1            | Model 2              | Model 1             | Model 2             |
| DLEast    | 2.9200<br>(<.0001) | 2.0900<br>(<.0001)   | 1.8500<br>(<.0001)  | 0.9552<br>(<.0001)  |
| DLWest    | 2.7300<br>(<.0001) | 1.6300<br>(<.0001)   | 1.5500<br>(<.0001)  | 0.8602<br>(<.0001)  |
| DLCentral | 0.2515<br>(0.131)  | -0.2964<br>(0.0799)  | -0.0831<br>(0.0043) | -0.0280<br>(0.3121) |
| Micro     |                    | -31.8600<br>(<.0001) |                     | -0.8938<br>(0.0651) |
| Singapore |                    | 22.7300<br>(<.0001)  |                     | 10.4700<br>(<.0001) |
| CC        |                    | -15.4500<br>(<.0001) |                     | -0.7770<br>(0.0022) |
| Free      |                    | 15.7500<br>(<.0001)  |                     | 0.0671<br>(0.8304)  |
| CG        |                    | 9.2600<br>(<.0001)   |                     | -0.0293<br>(0.9112) |
| Reduced   |                    | 14.7200<br>(<.0001)  |                     | 0.2209<br>(0.6499)  |
| Obs       | 9816               | 9816                 | 9816                | 9816                |

## Price Differential Regressions (C1.xlarge)

|           | Windows             |                      | Linux/Unix         |                       |
|-----------|---------------------|----------------------|--------------------|-----------------------|
|           | Model 1             | Model 2              | Model 1            | Model 2               |
| DLEast    | 15.5500<br>(<.0001) | 7.9900<br>(<.0001)   | 3.0000<br>(<.0001) | 3.7300<br>(<.0001)    |
| DLWest    | 12.6200<br>(<.0001) | 6.6600<br>(<.0001)   | 4.0400<br>(<.0001) | 3.1200<br>(<.0001)    |
| DLCentral | -1.6100<br>(<.0001) | -1.0900<br>(0.0061)  | 2.6600<br>(<.0001) | 0.1059<br>(0.8561)    |
| Micro     |                     | 1.3600<br>(0.8448)   |                    | 46.6900<br>(<.0001)   |
| Singapore |                     | 90.2700<br>(<.0001)  |                    | 43.4700<br>(<.0001)   |
| CC        |                     | -29.9300<br>(<.0001) |                    | -48.8800<br>(<.0001)  |
| Free      |                     | -8.2100<br>(0.0674)  |                    | -166.2200<br>(<.0001) |
| CG        |                     | 6.2100<br>(0.0988)   |                    | 189.6000<br>(<.0001)  |
| Reduced   |                     | 21.7300<br>(0.0018)  |                    | -43.7600<br>(<.0001)  |
| Obs       | 9816                | 9816                 | 9816               | 9816                  |

### Price Differential Regressions (m1.large)

|           | Windows             |                      | Linux/Unix         |                      |
|-----------|---------------------|----------------------|--------------------|----------------------|
|           | Model 1             | Model 2              | Model 1            | Model 2              |
| DLEast    | 6.1100<br>(<.0001)  | 3.9800<br>(<.0001)   | 2.6000<br>(<.0001) | 1.7100<br>(<.0001)   |
| DLWest    | 5.0900<br>(<.0001)  | 3.3600<br>(<.0001)   | 2.6900<br>(<.0001) | 1.6700<br>(<.0001)   |
| DLCentral | -0.2253<br>(0.0652) | -0.2020<br>(0.1006)  | 0.1215<br>(0.3481) | 0.0391<br>(0.7641)   |
| Micro     |                     | -1.5400<br>(0.4733)  |                    | -2.8000<br>(0.2192)  |
| Singapore |                     | 28.5600<br>(<.0001)  |                    | 14.3700<br>(<.0001)  |
| CC        |                     | -16.3500<br>(<.0001) |                    | -13.0200<br>(<.0001) |
| Free      |                     | -3.2800<br>(0.0185)  |                    | -0.8720<br>(0.5535)  |
| CG        |                     | 1.1100<br>(0.3402)   |                    | 20.3100<br>(<.0001)  |
| Reduced   |                     | 14.4400<br>(<.0001)  |                    | 0.2245<br>(0.9218)   |
| Obs       | 9816                | 9816                 | 9816               | 9816                 |

### Price Differential Regressions (m1.small)

|           | Windows             |                      | Linux/Unix          |                     |
|-----------|---------------------|----------------------|---------------------|---------------------|
|           | Model 1             | Model 2              | Model 1             | Model 2             |
| DLEast    | 0.3250<br>(0.0004)  | 0.7429<br>(<.0001)   | 0.9924<br>(<.0001)  | 0.6404<br>(<.0001)  |
| DLWest    | 0.2528<br>(0.0001)  | 0.1852<br>(0.0014)   | 0.5903<br>(<.0001)  | 0.3502<br>(<.0001)  |
| DLCentral | -0.9401<br>(<.0001) | -0.4153<br>(<.0001)  | -0.4810<br>(<.0001) | -0.2897<br>(<.0001) |
| Micro     |                     | -17.7000<br>(<.0001) |                     | 0.5652<br>(0.0522)  |
| Singapore |                     | -16.4100<br>(<.0001) |                     | 2.5700<br>(<.0001)  |
| CC        |                     | 19.1000<br>(<.0001)  |                     | 0.9987<br>(0.0066)  |
| Free      |                     | 60.3600<br>(<.0001)  |                     | 0.3032<br>(0.3259)  |
| CG        |                     | -0.7255<br>(0.2796)  |                     | -1.7800<br>(0.0019) |
| Reduced   |                     | -33.3900<br>(<.0001) |                     | 0.5652<br>(0.0522)  |
| Obs       | 9816                | 9816                 | 9816                | 9816                |

### Price Differential Regressions (m2.xlarge)

|           | Windows             |                      | Linux/Unix          |                      |
|-----------|---------------------|----------------------|---------------------|----------------------|
|           | Model 1             | Model 2              | Model 1             | Model 2              |
| DLEast    | 7.4100<br>(<.0001)  | 4.5000<br>(<.0001)   | 5.6000<br>(<.0001)  | 0.9614<br>(0.0048)   |
| DLWest    | 5.4200<br>(<.0001)  | 3.2900<br>(<.0001)   | 4.4300<br>(<.0001)  | 0.9048<br>(0.0003)   |
| DLCentral | -1.6600<br>(<.0001) | -1.0300<br>(<.0001)  | -0.3749<br>(0.2113) | -0.1705<br>(0.5784)  |
| Micro     |                     | -0.4483<br>(0.9221)  |                     | 10.8100<br>(0.0439)  |
| Singapore |                     | 22.3500<br>(<.0001)  |                     | 56.3700<br>(<.0001)  |
| CC        |                     | 14.2600<br>(<.0001)  |                     | 3.0200<br>(0.2814)   |
| Free      |                     | -38.7000<br>(<.0001) |                     | 7.9300<br>(0.0223)   |
| CG        |                     | 34.9400<br>(<.0001)  |                     | -9.3200<br>(0.0014)  |
| Reduced   |                     | 0.7416<br>(0.8721)   |                     | -24.4800<br>(<.0001) |
| Obs       | 9816                | 9816                 | 9816                | 9816                 |

### Price Differential Regressions (m2.2xlarge)

|           | Windows             |                       | Linux/Unix          |                      |
|-----------|---------------------|-----------------------|---------------------|----------------------|
|           | Model 1             | Model 2               | Model 1             | Model 2              |
| DLEast    | 13.4700<br>(<.0001) | 8.2200<br>(<.0001)    | 13.6900<br>(<.0001) | 7.7400<br>(<.0001)   |
| DLWest    | 14.0900<br>(<.0001) | 8.2900<br>(<.0001)    | 9.9400<br>(<.0001)  | 5.4300<br>(<.0001)   |
| DLCentral | 2.9300<br>(<.0001)  | 1.8400<br>(0.001)     | -2.6000<br>(<.0001) | -1.7700<br>(<.0001)  |
| Micro     |                     | -158.1600<br>(<.0001) |                     | 1.1400<br>(0.8126)   |
| Singapore |                     | 89.9300<br>(<.0001)   |                     | 57.4800<br>(<.0001)  |
| CC        |                     | -6.2000<br>(0.2247)   |                     | 13.0100<br>(<.0001)  |
| Free      |                     | 155.3700<br>(<.0001)  |                     | -48.1800<br>(<.0001) |
| CG        |                     | -0.7500<br>(0.8874)   |                     | 46.6400<br>(<.0001)  |
| Reduced   |                     | 4.7700<br>(0.6269)    |                     | -3.9700<br>(0.4098)  |
| Obs       | 9816                | 9816                  | 9816                | 9816                 |

### Price Differential Regressions (m2.4xlarge)

|           | Windows             |                      | Linux/Unix          |                      |
|-----------|---------------------|----------------------|---------------------|----------------------|
|           | Model 1             | Model 2              | Model 1             | Model 2              |
| DLEast    | 34.4600<br>(<.0001) | 17.3700<br>(<.0001)  | 26.7300<br>(<.0001) | 14.2700<br>(<.0001)  |
| DLWest    | 28.1900<br>(<.0001) | 15.1200<br>(<.0001)  | 20.7100<br>(<.0001) | 11.0700<br>(<.0001)  |
| DLCentral | -2.1400<br>(<.0001) | -0.5971<br>(0.2366)  | -2.2000<br>(<.0001) | -1.4800<br>(0.004)   |
| Micro     |                     | -4.6000<br>(0.602)   |                     | 1.2800<br>(0.8873)   |
| Singapore |                     | 191.9600<br>(<.0001) |                     | 149.2500<br>(<.0001) |
| CC        |                     | -19.3800<br>(<.0001) |                     | -23.6000<br>(<.0001) |
| Free      |                     | -8.6700<br>(0.1284)  |                     | -5.1700<br>(0.3747)  |
| CG        |                     | 0.8298<br>(0.8623)   |                     | -1.2500<br>(0.7978)  |
| Reduced   |                     | 15.1900<br>(0.0866)  |                     | 6.3200<br>(0.4852)   |
| Obs       | 9816                | 9816                 | 9816                | 9816                 |

### Price Differential Regressions (t1.micro)

|           | Windows            |                     | Linux/Unix         |                     |
|-----------|--------------------|---------------------|--------------------|---------------------|
|           | Model 1            | Model 2             | Model 1            | Model 2             |
| DLEast    | 0.2494<br>(<.0001) | -0.0383<br>(0.1661) | 0.2387<br>(<.0001) | 0.0834<br>(0.2837)  |
| DLWest    | 0.1638<br>(<.0001) | -0.0132<br>(0.3762) | 0.1368<br>(<.0001) | 0.0096<br>(0.8202)  |
| DLCentral | 0.1052<br>(<.0001) | 0.1089<br>(<.0001)  | 0.1599<br>(0.0021) | 0.1677<br>(0.0012)  |
| Micro     |                    | 0.9824<br>(<.0001)  |                    | 0.0000<br>(.)       |
| Singapore |                    | 0.0000<br>(.)       |                    | 0.0000<br>(.)       |
| CC        |                    | 0.0000<br>(.)       |                    | 2.6600<br>(<.0001)  |
| Free      |                    | 1.8300<br>(<.0001)  |                    | -0.4338<br>(0.1483) |
| CG        |                    | 0.1308<br>(0.2207)  |                    | 0.0000<br>(.)       |
| Reduced   |                    | 0.0000<br>(.)       |                    | 0.0000<br>(.)       |
| Obs       | 9816               | 9816                | 9816               | 9816                |

(.) – could not estimate indicator effect due to singular matrix.

# Price Differential Regressions: Alternative Frequencies

In this set of results, we provide additional robustness checks using alternative measured data frequencies. The results reported below further confirm the significance of latency differentials on west-east price differentials regardless of the measured frequency.

## Price Differential Regressions (m1.xlarge) at 60 min level (estimated coefficient\*1000)

|            | Windows             |                     |                     |                     | Linux/Unix          |                     |                     |                     |
|------------|---------------------|---------------------|---------------------|---------------------|---------------------|---------------------|---------------------|---------------------|
|            | Model 1             | Model 2             | Model 3             | Model 4             | Model 1             | Model 2             | Model 3             | Model 4             |
| DLEast     | 12.7300<br>(<.0001) | 6.3900<br>(<.0001)  |                     |                     | 7.4700<br>(<.0001)  | 3.9800<br>(<.0001)  |                     |                     |
| DLWest     | 10.3900<br>(<.0001) | 5.5400<br>(<.0001)  |                     |                     | 5.7800<br>(<.0001)  | 3.3100<br>(<.0001)  |                     |                     |
| DLCentral  | -0.8392<br>(<.0001) | -0.2771<br>(0.0373) |                     |                     | -1.1200<br>(<.0001) | -0.1880<br>(0.3686) |                     |                     |
| LD_Newark  |                     |                     | 2.6000<br>(<.0001)  | 1.5700<br>(<.0001)  |                     |                     | 1.9300<br>(<.0001)  | 1.4500<br>(<.0001)  |
| LD_SJ      |                     |                     | 1.6200<br>(<.0001)  | 0.8695<br>(<.0001)  |                     |                     | 1.0300<br>(<.0001)  | 0.6413<br>(<.0001)  |
| LD_Atlanta |                     |                     | 0.3906<br>(<.0001)  | 0.0399<br>(0.6054)  |                     |                     | -0.5097<br>(<.0001) | -0.6156<br>(<.0001) |
| LD_StLouis |                     |                     | 0.6246<br>(<.0001)  | 0.4437<br>(<.0001)  |                     |                     | 0.3642<br>(0.0024)  | 0.4539<br>(0.0002)  |
| LD_Seattle |                     |                     | 1.6900<br>(<.0001)  | 0.9296<br>(<.0001)  |                     |                     | 0.8862<br>(<.0001)  | 0.5101<br>(<.0001)  |
| LD_Mesa    |                     |                     | 1.3000<br>(<.0001)  | 0.7123<br>(<.0001)  |                     |                     | 0.8640<br>(<.0001)  | 0.5967<br>(<.0001)  |
| LD_SD      |                     |                     | 3.6300<br>(<.0001)  | 2.1400<br>(<.0001)  |                     |                     | 1.9900<br>(<.0001)  | 1.2800<br>(<.0001)  |
| LD_Reston  |                     |                     | 3.0600<br>(<.0001)  | 2.0500<br>(<.0001)  |                     |                     | 1.8400<br>(<.0001)  | 1.2900<br>(<.0001)  |
| LD_LA      |                     |                     | 1.9400<br>(<.0001)  | 1.4700<br>(<.0001)  |                     |                     | 0.9518<br>(<.0001)  | 0.6622<br>(<.0001)  |
| LD_Houston |                     |                     | 0.0729<br>(0.1361)  | -0.0583<br>(0.2002) |                     |                     | -0.2899<br>(<.0001) | -0.1468<br>(0.0547) |
| LD_NY      |                     |                     | 0.7287<br>(<.0001)  | 0.3667<br>(<.0001)  |                     |                     | 0.4315<br>(0.0001)  | 0.2321<br>(0.0379)  |
| LD_KC      |                     |                     | -0.1630<br>(0.0086) | -0.2854<br>(<.0001) |                     |                     | 0.1118<br>(0.2308)  | -0.0932<br>(0.3215) |
| LD_Philly  |                     |                     | 2.8300<br>(<.0001)  | 1.7200<br>(<.0001)  |                     |                     | 1.6600<br>(<.0001)  | 1.1500<br>(<.0001)  |
| LD_Boston  |                     |                     | 0.7823<br>(<.0001)  | 0.4625<br>(<.0001)  |                     |                     | 0.7739<br>(<.0001)  | 0.5147<br>(<.0001)  |
| LD_DC      |                     |                     | 1.2000<br>(<.0001)  | 0.5767<br>(<.0001)  |                     |                     | 0.6820<br>(<.0001)  | 0.3497<br>(0.0047)  |
| LD_Chicago |                     |                     | 0.4902<br>(<.0001)  | 0.5493<br>(<.0001)  |                     |                     | 0.0602<br>(0.418)   | 0.3724<br>(<.0001)  |
| LD_Dallas  |                     |                     | -0.0281<br>(0.7054) | -0.0714<br>(0.2766) |                     |                     | 0.0315<br>(0.7775)  | -0.0195<br>(0.8592) |
| LD_Denver  |                     |                     | 0.3716<br>(<.0001)  | 0.2199<br>(<.0001)  |                     |                     | 0.1924<br>(0.0043)  | 0.1353<br>(0.0424)  |
| Micro      |                     | 0.7720<br>(0.7401)  |                     | 1.0300<br>(0.6357)  |                     | 9.0600<br>(0.0132)  |                     | 8.4800<br>(0.0198)  |
| Singapore  |                     | 70.9900<br>(<.0001) |                     | 54.9600<br>(<.0001) |                     | 25.8800<br>(<.0001) |                     | 15.0400<br>(<.0001) |
| CC         |                     | -2.1900<br>(0.0721) |                     | -0.4436<br>(0.6984) |                     | 8.9800<br>(<.0001)  |                     | 9.6300<br>(<.0001)  |
| Free       |                     | -0.7916<br>(0.5988) |                     | -0.3511<br>(0.8004) |                     | -0.5696<br>(0.8096) |                     | -0.2457<br>(0.9161) |
| CG         |                     | 0.4957<br>(0.6945)  |                     | -1.0800<br>(0.3587) |                     | -2.1200<br>(0.2854) |                     | -3.2200<br>(0.1025) |
| Reduced    |                     | -4.3800<br>(0.061)  |                     | -1.9500<br>(0.3714) |                     | -4.7800<br>(0.1932) |                     | -2.5900<br>(0.4788) |
| Obs        | 9816                | 9816                | 9816                | 9816                | 9816                | 9816                | 9816                | 9816                |

## Price Differential Regressions (m1.xlarge) at daily level

|            | Windows             |                      |                      |                      | Linux/Unix           |                      |                       |                      |
|------------|---------------------|----------------------|----------------------|----------------------|----------------------|----------------------|-----------------------|----------------------|
|            | Model 1             | Model 2              | Model 3              | Model 4              | Model 1              | Model 2              | Model 3               | Model 4              |
| DLEast     | 0.01498<br>(<.0001) | 0.01412<br>(<.0001)  |                      |                      | 0.0075<br>(0.0048)   | 0.00943<br>(0.0054)  |                       |                      |
| DLWest     | 0.00932<br>(<.0001) | 0.01072<br>(<.0001)  |                      |                      | 0.00632<br>(0.0019)  | 0.00535<br>(0.0374)  |                       |                      |
| DLCentral  | 0.00178<br>(<.0001) | 0.000312<br>(0.5195) |                      |                      | -0.00133<br>(0.4393) | 0.00122<br>(0.5829)  |                       |                      |
| LD_Newark  |                     |                      | 0.00419<br>(<.0001)  | 0.00422<br>(<.0001)  |                      |                      | 0.00803<br>(0.1381)   | 0.00742<br>(0.1779)  |
| LD_SJ      |                     |                      | 0.00121<br>(0.0003)  | 0.0012<br>(0.001)    |                      |                      | -0.00141<br>(0.4096)  | -0.00145<br>(0.4369) |
| LD_Atlanta |                     |                      | -0.00015<br>(0.7808) | -0.00029<br>(0.6193) |                      |                      | -0.01446<br>(<.0001)  | -0.01456<br>(<.0001) |
| LD_StLouis |                     |                      | 0.00152<br>(0.0047)  | 0.00157<br>(0.0093)  |                      |                      | 0.00296<br>(0.2785)   | 0.00497<br>(0.1087)  |
| LD_Seattle |                     |                      | 0.00198<br>(<.0001)  | 0.00206<br>(<.0001)  |                      |                      | -0.000808<br>(0.7443) | -0.0016<br>(0.5436)  |
| LD_Mesa    |                     |                      | 0.00063<br>(0.3463)  | 0.00045<br>(0.5112)  |                      |                      | 0.00689<br>(0.0434)   | 0.00715<br>(0.0427)  |
| LD_SD      |                     |                      | -0.00507<br>(<.0001) | -0.00434<br>(<.0001) |                      |                      | -0.00415<br>(0.358)   | -0.00343<br>(0.4835) |
| LD_Reston  |                     |                      | 0.00355<br>(<.0001)  | 0.00402<br>(<.0001)  |                      |                      | 0.00642<br>(0.081)    | 0.0055<br>(0.1579)   |
| LD_LA      |                     |                      | 0.00048<br>(0.0985)  | 0.00063<br>(0.0464)  |                      |                      | -0.00205<br>(0.1716)  | -0.00208<br>(0.2018) |
| LD_Houston |                     |                      | -9.1E-05<br>(0.2217) | -6.7E-05<br>(0.4038) |                      |                      | 4.91E-05<br>(0.8972)  | 0.000157<br>(0.7033) |
| LD_NY      |                     |                      | -0.00044<br>(0.3945) | -0.00072<br>(0.1808) |                      |                      | 0.0018<br>(0.4999)    | 0.00192<br>(0.4888)  |
| LD_KC      |                     |                      | -0.00011<br>(0.6746) | -0.00018<br>(0.5639) |                      |                      | 0.000651<br>(0.6388)  | -0.00048<br>(0.7615) |
| LD_Philly  |                     |                      | 0.00606<br>(<.0001)  | 0.00591<br>(<.0001)  |                      |                      | 0.00378<br>(0.4935)   | 0.00232<br>(0.6831)  |
| LD_Boston  |                     |                      | -0.00011<br>(0.8475) | -3.5E-05<br>(0.9505) |                      |                      | 0.00361<br>(0.2069)   | 0.00317<br>(0.2802)  |
| LD_DC      |                     |                      | 0.000866<br>(0.0135) | 0.000515<br>(0.2999) |                      |                      | -0.00022<br>(0.904)   | 3.4E-05<br>(0.9894)  |
| LD_Chicago |                     |                      | 0.000924<br>(<.0001) | 0.000913<br>(0.0002) |                      |                      | -0.00058<br>(0.4622)  | 0.000628<br>(0.6205) |
| LD_Dallas  |                     |                      | 0.0011<br>(0.0522)   | 0.000863<br>(0.1344) |                      |                      | 0.00228<br>(0.4296)   | 0.00244<br>(0.4096)  |
| LD_Denver  |                     |                      | 0.00058<br>(0.1511)  | 0.00052<br>(0.1984)  |                      |                      | -0.00343<br>(0.0986)  | -0.00353<br>(0.0924) |
| Micro      |                     | 0.00169<br>(0.5619)  |                      | 0.00044<br>(0.8733)  |                      | 0.01082<br>(0.4194)  |                       | 0.01324<br>(0.3509)  |
| Singapore  |                     | 0.00191<br>(0.3555)  |                      | 0.00281<br>(0.2042)  |                      | -0.01531<br>(0.1065) |                       | 0.000516<br>(0.9638) |
| CC         |                     | -0.00186<br>(0.2285) |                      | 0.00267<br>(0.1561)  |                      | 0.00958<br>(0.1776)  |                       | 0.00321<br>(0.7395)  |
| Free       |                     | -0.00361<br>(0.0569) |                      | -0.00046<br>(0.7891) |                      | -0.00148<br>(0.8651) |                       | 0.00304<br>(0.7312)  |
| CG         |                     | 0.00281<br>(0.081)   |                      | -0.00012<br>(0.9438) |                      | -0.00055<br>(0.9402) |                       | -0.00342<br>(0.7003) |
| Reduced    |                     | -0.00627<br>(0.0291) |                      | -0.00251<br>(0.3756) |                      | -0.00619<br>(0.6381) |                       | -0.00069<br>(0.962)  |
| Obs        | 409                 | 409                  | 409                  | 409                  | 409                  | 409                  | 409                   | 409                  |

## Additional Outlier Tests

In this set of results, we provide additional outlier robustness checks. The results reported below further confirm the significance of latency differentials on west-east price differentials even after further winsorizing the data for potential outliers.

### Additional Outlier Test: Winsorization of the Dataset to the 3% level (3<sup>rd</sup> and 97<sup>th</sup> percentiles)

|           | <i>Windows</i>          |                         | <i>Linux/Unix</i>       |                         |
|-----------|-------------------------|-------------------------|-------------------------|-------------------------|
|           | <i>P<sub>East</sub></i> | <i>P<sub>West</sub></i> | <i>P<sub>East</sub></i> | <i>P<sub>West</sub></i> |
| Obs       | 9816                    | 9816                    | 9816                    | 9816                    |
| Mean      | 0.40016198              | 0.531780766             | 0.240983191             | 0.319482681             |
| Median    | 0.401                   | 0.53                    | 0.241                   | 0.319                   |
| Std. dev. | 0.012374141             | 0.015610465             | 0.009267971             | 0.009452582             |
| Max       | 0.419                   | 0.558                   | 0.28                    | 0.335                   |
| Min       | 0.381                   | 0.508                   | 0.228                   | 0.304                   |

  

|           | <i>DL<sub>East</sub></i> | <i>DL<sub>West</sub></i> | <i>DL<sub>Central</sub></i> |
|-----------|--------------------------|--------------------------|-----------------------------|
| Obs       | 9816                     | 9816                     | 9816                        |
| Mean      | 4.831106                 | 5.648145                 | 0.902995                    |
| Median    | 4.795857                 | 5.5465                   | 0.9526                      |
| Std. dev. | 0.45179                  | 0.949359                 | 1.404466                    |
| Max       | 5.953714                 | 8.388                    | 7.4666                      |
| Min       | 3.790429                 | 4.011                    | -0.9898                     |

### Additional Outlier Test: Winsorization of the Dataset to the 5% level (5<sup>th</sup> and 95<sup>th</sup> percentiles)

|           | <i>Windows</i>          |                         | <i>Linux/Unix</i>       |                         |
|-----------|-------------------------|-------------------------|-------------------------|-------------------------|
|           | <i>P<sub>East</sub></i> | <i>P<sub>West</sub></i> | <i>P<sub>East</sub></i> | <i>P<sub>West</sub></i> |
| Obs       | 9816                    | 9816                    | 9816                    | 9816                    |
| Mean      | 0.400                   | 0.532                   | 0.240                   | 0.319                   |
| Median    | 0.401                   | 0.53                    | 0.241                   | 0.319                   |
| Std. dev. | 0.0122                  | 0.0155                  | 0.00925                 | 0.00943                 |
| Max       | 0.418                   | 0.557                   | 0.280                   | 0.334                   |
| Min       | 0.382                   | 0.509                   | 0.229                   | 0.305                   |

  

|           | <i>DL<sub>East</sub></i> | <i>DL<sub>West</sub></i> | <i>DL<sub>Central</sub></i> |
|-----------|--------------------------|--------------------------|-----------------------------|
| Obs       | 9816                     | 9816                     | 9816                        |
| Mean      | 4.8379515                | 6.0490156                | 0.6830370                   |
| Median    | 4.795857                 | 5.5465                   | 0.9526                      |
| Std. dev. | 0.4011660                | 0.9574035                | 0.8725274                   |
| Max       | 5.8930000                | 8.2638000                | 3.6075000                   |
| Min       | 3.7515714                | 4.0924000                | -0.9508333                  |

### Outlier Regression Test: Winsorized Data (3%, 97%) and (5%, 95%)

#### Windows: Table 6, Models 1-2

|                       | <i>Winsorized (3%, 97%)</i> |                    | <i>Winsorized (5%, 95%)</i> |                    |
|-----------------------|-----------------------------|--------------------|-----------------------------|--------------------|
|                       | <i>Model 1</i>              | <i>Model 2</i>     | <i>Model 1</i>              | <i>Model 2</i>     |
| DL <sub>East</sub>    | 12.790<br>(<.0001)          | 6.420<br>(<.0001)  | 19.940<br>(<.0001)          | 19.280<br>(<.0001) |
| DL <sub>West</sub>    | 10.390<br>(<.0001)          | 5.540<br>(<.0001)  | 5.450<br>(<.0001)           | 4.660<br>(<.0001)  |
| DL <sub>Central</sub> | -0.860<br>(<.0001)          | -0.292<br>(0.0263) | 2.260<br>(<.0001)           | -1.460<br>(0.0263) |
| Micro                 |                             | 0.739<br>(0.7477)  |                             | 4.700<br>(0.0056)  |
| Singapore             |                             | 70.610             |                             | 11.740             |

|         |      |          |      |          |
|---------|------|----------|------|----------|
|         |      | (<.0001) |      | (<.0001) |
| CC      |      | -1.480   |      | -3.800   |
|         |      | (0.1802) |      | (<.0001) |
| Free    |      | -0.808   |      | -1.390   |
|         |      | (0.5866) |      | (0.2061) |
| CG      |      | 2.280    |      | 7.050    |
|         |      | (0.0801) |      | (<.0001) |
| Reduced |      | -4.780   |      | -6.310   |
|         |      | (0.0351) |      | (0.0002) |
| Tokyo   |      | -4.080   |      | -5.430   |
|         |      | (<.0001) |      | (<.0001) |
| Obs     | 9816 | 9816     | 9816 | 9816     |

---

## Nonlinear VAR Test with Squared Prices (Table 2 Robustness Check)

In this set of results, we provide an additional robustness check using nonlinear price transformations. The results below show that because of the high correlation between price levels and their squared transformations (0.99 – see the price correlation table below), specifications that include nonlinear price transformations have significant multicollinearity problems. Similarly, specifications with just nonlinear terms yield similar results to Table 2.

|                   | Windows    |                     | Linux/Unix           |                     |
|-------------------|------------|---------------------|----------------------|---------------------|
|                   | $P^{East}$ | $P^{West}$          | $P^{East}$           | $P^{West}$          |
| $P_{East\,t-1}$   | 0.981      | -0.746              | -                    | 0.161 <sup>*</sup>  |
|                   | (0.267)    | (0.489)             | 1.661 <sup>***</sup> | (0.037)             |
| $P_{East\,t-1}^2$ | -1.057     | 0.919               | 3.862 <sup>***</sup> | -0.305 <sup>*</sup> |
|                   | (0.339)    | (0.495)             | (0.000)              | (0.032)             |
| $P_{East\,t-2}$   | -0.274     | 1.308               | -0.178               | -0.0408             |
|                   | (0.769)    | (0.250)             | (0.079)              | (0.622)             |
| $P_{East\,t-2}^2$ | 0.367      | -1.632              | 0.441 <sup>*</sup>   | 0.0562              |
|                   | (0.753)    | (0.252)             | (0.020)              | (0.717)             |
| $P_{East\,t-3}$   | -0.537     | 0.311               | 0.338 <sup>***</sup> | 0.0190              |
|                   | (0.564)    | (0.784)             | (0.001)              | (0.818)             |
| $P_{East\,t-3}^2$ | 0.794      | -0.381              | -0.491 <sup>**</sup> | -0.00913            |
|                   | (0.496)    | (0.789)             | (0.010)              | (0.953)             |
| $P_{East\,t-4}$   | 1.630      | -0.390              | -                    | 0.115               |
|                   | (0.081)    | (0.732)             | 0.615 <sup>***</sup> | (0.164)             |
| $P_{East\,t-4}^2$ | -2.087     | 0.480               | 1.194 <sup>***</sup> | -0.195              |
|                   | (0.074)    | (0.736)             | (0.000)              | (0.208)             |
| $P_{East\,t-5}$   | -1.053     | 1.590               | 0.252 <sup>**</sup>  | -0.145              |
|                   | (0.234)    | (0.140)             | (0.008)              | (0.061)             |
| $P_{East\,t-5}^2$ | 1.318      | -1.997              | -0.399 <sup>*</sup>  | 0.267               |
|                   | (0.233)    | (0.138)             | (0.023)              | (0.061)             |
| $P_{West\,t-1}$   | 0.286      | -2.177 <sup>*</sup> | -0.378               | 0.140               |
|                   | (0.683)    | (0.011)             | (0.717)              | (0.869)             |
| $P_{West\,t-1}^2$ | -0.271     | 2.329 <sup>**</sup> | 0.560                | 0.296               |
|                   | (0.680)    | (0.004)             | (0.731)              | (0.824)             |
| $P_{West\,t-2}$   | -1.125     | 0.234               | 0.0720               | 0.107               |
|                   | (0.146)    | (0.804)             | (0.950)              | (0.909)             |
| $P_{West\,t-2}^2$ | 1.068      | -0.220              | -0.106               | -0.182              |
|                   | (0.142)    | (0.804)             | (0.953)              | (0.902)             |
| $P_{West\,t-3}$   | 0.460      | 1.176               | -0.717               | -1.274              |
|                   | (0.552)    | (0.213)             | (0.534)              | (0.176)             |
| $P_{West\,t-3}^2$ | -0.443     | -1.064              | 1.080                | 2.041               |
|                   | (0.542)    | (0.230)             | (0.549)              | (0.165)             |
| $P_{West\,t-4}$   | 0.759      | -0.573              | -1.130               | -0.458              |
|                   | (0.327)    | (0.544)             | (0.327)              | (0.626)             |
| $P_{West\,t-4}^2$ | -0.720     | 0.511               | 1.805                | 0.696               |
|                   | (0.322)    | (0.564)             | (0.317)              | (0.636)             |
| $P_{West\,t-5}$   | 0.0177     | 0.202               | -1.198               | -0.545              |
|                   | (0.980)    | (0.813)             | (0.250)              | (0.522)             |
| $P_{West\,t-5}^2$ | -0.00399   | -0.175              | 1.894                | 0.851               |
|                   | (0.995)    | (0.827)             | (0.245)              | (0.522)             |
| <i>Constar</i>    | 0.101      | 0.335               | 0.958 <sup>***</sup> | 0.574 <sup>**</sup> |
|                   | (0.781)    | (0.448)             | (0.000)              | (0.002)             |
| $N$               | 9816       | 9816                | 9816                 | 9816                |
| adj. $R^2$        | 0.030      | 0.096               | 0.525                | 0.110               |

## Correlations between Lagged Price Levels and Nonlinear (squared) Transformations: Windows Platform

|                    | $P_{East_{t-1}}$ | $P^2_{East_{t-1}}$ | $P_{East_{t-2}}$ | $P^2_{East_{t-2}}$ | $P_{East_{t-3}}$ | $P^2_{East_{t-3}}$ | $P_{East_{t-4}}$ | $P^2_{East_{t-4}}$ | $P_{East_{t-5}}$ | $P^2_{East_{t-5}}$ | $P_{West_{t-1}}$ | $P^2_{West_{t-1}}$ | $P_{West_{t-2}}$ | $P^2_{West_{t-2}}$ | $P_{West_{t-3}}$ | $P^2_{West_{t-3}}$ | $P_{West_{t-4}}$ | $P^2_{West_{t-4}}$ | $P_{West_{t-5}}$ | $P^2_{West_{t-5}}$ |
|--------------------|------------------|--------------------|------------------|--------------------|------------------|--------------------|------------------|--------------------|------------------|--------------------|------------------|--------------------|------------------|--------------------|------------------|--------------------|------------------|--------------------|------------------|--------------------|
| $P_{East_{t-1}}$   | 1                |                    |                  |                    |                  |                    |                  |                    |                  |                    |                  |                    |                  |                    |                  |                    |                  |                    |                  |                    |
| $P^2_{East_{t-1}}$ | 0.9999           | 1                  |                  |                    |                  |                    |                  |                    |                  |                    |                  |                    |                  |                    |                  |                    |                  |                    |                  |                    |
| $P_{East_{t-2}}$   | 0.139            | 0.1388             | 1                |                    |                  |                    |                  |                    |                  |                    |                  |                    |                  |                    |                  |                    |                  |                    |                  |                    |
| $P^2_{East_{t-2}}$ | 0.1389           | 0.1387             | 0.9999           | 1                  |                  |                    |                  |                    |                  |                    |                  |                    |                  |                    |                  |                    |                  |                    |                  |                    |
| $P_{East_{t-3}}$   | 0.0502           | 0.05               | 0.139            | 0.1388             | 1                |                    |                  |                    |                  |                    |                  |                    |                  |                    |                  |                    |                  |                    |                  |                    |
| $P^2_{East_{t-3}}$ | 0.0502           | 0.05               | 0.1389           | 0.1387             | 0.9999           | 1                  |                  |                    |                  |                    |                  |                    |                  |                    |                  |                    |                  |                    |                  |                    |
| $P_{East_{t-4}}$   | 0.1022           | 0.1024             | 0.0502           | 0.0501             | 0.1391           | 0.1388             | 1                |                    |                  |                    |                  |                    |                  |                    |                  |                    |                  |                    |                  |                    |
| $P^2_{East_{t-4}}$ | 0.1022           | 0.1024             | 0.0502           | 0.0501             | 0.1389           | 0.1387             | 0.9999           | 1                  |                  |                    |                  |                    |                  |                    |                  |                    |                  |                    |                  |                    |
| $P_{East_{t-5}}$   | -0.0103          | -0.0103            | 0.1022           | 0.1024             | 0.0503           | 0.0501             | 0.139            | 0.1388             | 1                |                    |                  |                    |                  |                    |                  |                    |                  |                    |                  |                    |
| $P^2_{East_{t-5}}$ | -0.0105          | -0.0105            | 0.1023           | 0.1025             | 0.0503           | 0.0501             | 0.1389           | 0.1387             | 0.9999           | 1                  |                  |                    |                  |                    |                  |                    |                  |                    |                  |                    |
| $P_{West_{t-1}}$   | 0.0092           | 0.009              | -0.0046          | -0.0046            | -0.0002          | -0.0003            | 0.0049           | 0.0047             | -0.0039          | -0.0039            | 1                |                    |                  |                    |                  |                    |                  |                    |                  |                    |
| $P^2_{West_{t-1}}$ | 0.0092           | 0.009              | -0.0046          | -0.0047            | -0.0001          | -0.0003            | 0.0051           | 0.005              | -0.0037          | -0.0038            | 0.9999           | 1                  |                  |                    |                  |                    |                  |                    |                  |                    |
| $P_{West_{t-2}}$   | 0.0017           | 0.0015             | 0.0092           | 0.009              | -0.0046          | -0.0046            | -0.0001          | -0.0003            | 0.0049           | 0.0048             | 0.3076           | 0.3075             | 1                |                    |                  |                    |                  |                    |                  |                    |
| $P^2_{West_{t-2}}$ | 0.0017           | 0.0015             | 0.0092           | 0.009              | -0.0046          | -0.0046            | -0.0001          | -0.0002            | 0.0052           | 0.005              | 0.3079           | 0.3079             | 0.9999           | 1                  |                  |                    |                  |                    |                  |                    |
| $P_{West_{t-3}}$   | 0.0116           | 0.0115             | 0.0018           | 0.0015             | 0.0092           | 0.0091             | -0.0046          | -0.0047            | -0.0002          | -0.0003            | 0.1034           | 0.1034             | 0.3077           | 0.3075             | 1                |                    |                  |                    |                  |                    |
| $P^2_{West_{t-3}}$ | 0.0118           | 0.0116             | 0.0018           | 0.0015             | 0.0093           | 0.0091             | -0.0046          | -0.0047            | -0.0001          | -0.0003            | 0.1036           | 0.1036             | 0.308            | 0.3079             | 0.9999           | 1                  |                  |                    |                  |                    |
| $P_{West_{t-4}}$   | -0.0095          | -0.0098            | 0.0117           | 0.0115             | 0.0018           | 0.0016             | 0.0093           | 0.0092             | -0.0046          | -0.0046            | 0.066            | 0.0659             | 0.1034           | 0.1034             | 0.3077           | 0.3076             | 1                |                    |                  |                    |
| $P^2_{West_{t-4}}$ | -0.0096          | -0.0099            | 0.0118           | 0.0117             | 0.0018           | 0.0016             | 0.0093           | 0.0092             | -0.0046          | -0.0046            | 0.066            | 0.0659             | 0.1036           | 0.1036             | 0.3081           | 0.308              | 0.9999           | 1                  |                  |                    |
| $P_{West_{t-5}}$   | -0.01            | -0.0102            | -0.0096          | -0.0099            | 0.0116           | 0.0115             | 0.0018           | 0.0015             | 0.0093           | 0.0091             | 0.0092           | 0.0091             | 0.0658           | 0.0657             | 0.1034           | 0.1033             | 0.3076           | 0.3074             | 1                |                    |
| $P^2_{West_{t-5}}$ | -0.0102          | -0.0104            | -0.0097          | -0.01              | 0.0117           | 0.0116             | 0.0018           | 0.0015             | 0.0093           | 0.0091             | 0.0092           | 0.0091             | 0.0658           | 0.0658             | 0.1036           | 0.1036             | 0.3079           | 0.3078             | 0.9999           | 1                  |

## Correlations between Lagged Price Levels and Nonlinear (squared) Transformations: Unix/Linux Platform

|                    | $P_{East_{t-1}}$ | $P_{East_{t-1}}^2$ | $P_{East_{t-2}}$ | $P_{East_{t-2}}^2$ | $P_{East_{t-3}}$ | $P_{East_{t-3}}^2$ | $P_{East_{t-4}}$ | $P_{East_{t-4}}^2$ | $P_{East_{t-5}}$ | $P_{East_{t-5}}^2$ | $P_{West_{t-1}}$ | $P_{West_{t-1}}^2$ | $P_{West_{t-2}}$ | $P_{West_{t-2}}^2$ | $P_{West_{t-3}}$ | $P_{West_{t-3}}^2$ | $P_{West_{t-4}}$ | $P_{West_{t-4}}^2$ | $P_{West_{t-5}}$ | $P_{West_{t-5}}^2$ |  |
|--------------------|------------------|--------------------|------------------|--------------------|------------------|--------------------|------------------|--------------------|------------------|--------------------|------------------|--------------------|------------------|--------------------|------------------|--------------------|------------------|--------------------|------------------|--------------------|--|
| $P_{East_{t-1}}$   | 1                |                    |                  |                    |                  |                    |                  |                    |                  |                    |                  |                    |                  |                    |                  |                    |                  |                    |                  |                    |  |
| $P_{East_{t-1}}^2$ | 0.9962           | 1                  |                  |                    |                  |                    |                  |                    |                  |                    |                  |                    |                  |                    |                  |                    |                  |                    |                  |                    |  |
| $P_{East_{t-2}}$   | 0.6627           | 0.6826             | 1                |                    |                  |                    |                  |                    |                  |                    |                  |                    |                  |                    |                  |                    |                  |                    |                  |                    |  |
| $P_{East_{t-2}}^2$ | 0.6828           | 0.705              | 0.9962           | 1                  |                  |                    |                  |                    |                  |                    |                  |                    |                  |                    |                  |                    |                  |                    |                  |                    |  |
| $P_{East_{t-3}}$   | 0.5645           | 0.5848             | 0.6626           | 0.6825             | 1                |                    |                  |                    |                  |                    |                  |                    |                  |                    |                  |                    |                  |                    |                  |                    |  |
| $P_{East_{t-3}}^2$ | 0.5852           | 0.6071             | 0.6827           | 0.705              | 0.9962           | 1                  |                  |                    |                  |                    |                  |                    |                  |                    |                  |                    |                  |                    |                  |                    |  |
| $P_{East_{t-4}}$   | 0.5265           | 0.5454             | 0.5644           | 0.5847             | 0.6626           | 0.6825             | 1                |                    |                  |                    |                  |                    |                  |                    |                  |                    |                  |                    |                  |                    |  |
| $P_{East_{t-4}}^2$ | 0.5441           | 0.5648             | 0.5851           | 0.6071             | 0.6827           | 0.705              | 0.9962           | 1                  |                  |                    |                  |                    |                  |                    |                  |                    |                  |                    |                  |                    |  |
| $P_{East_{t-5}}$   | 0.4773           | 0.4993             | 0.5265           | 0.5453             | 0.5644           | 0.5847             | 0.6626           | 0.6825             | 1                |                    |                  |                    |                  |                    |                  |                    |                  |                    |                  |                    |  |
| $P_{East_{t-5}}^2$ | 0.4981           | 0.5214             | 0.544            | 0.5648             | 0.5851           | 0.6071             | 0.6827           | 0.705              | 0.9962           | 1                  |                  |                    |                  |                    |                  |                    |                  |                    |                  |                    |  |
| $P_{West_{t-1}}$   | -0.0054          | -0.0056            | -0.0054          | -0.0069            | -0.0105          | -0.0106            | 0.0062           | 0.0053             | 0.014            | 0.0124             | 1                |                    |                  |                    |                  |                    |                  |                    |                  |                    |  |
| $P_{West_{t-1}}^2$ | -0.0056          | -0.0058            | -0.0055          | -0.0071            | -0.0105          | -0.0107            | 0.0063           | 0.0054             | 0.0139           | 0.0124             | 0.9999           | 1                  |                  |                    |                  |                    |                  |                    |                  |                    |  |
| $P_{West_{t-2}}$   | -0.0154          | -0.0155            | -0.0055          | -0.0057            | -0.0053          | -0.0068            | -0.0103          | -0.0105            | 0.0063           | 0.0054             | 0.3291           | 0.329              | 1                |                    |                  |                    |                  |                    |                  |                    |  |
| $P_{West_{t-2}}^2$ | -0.0153          | -0.0155            | -0.0056          | -0.0058            | -0.0054          | -0.0069            | -0.0104          | -0.0106            | 0.0064           | 0.0055             | 0.3292           | 0.3292             | 0.9999           | 1                  |                  |                    |                  |                    |                  |                    |  |
| $P_{West_{t-3}}$   | -0.0135          | -0.0133            | -0.0155          | -0.0156            | -0.0054          | -0.0056            | -0.0052          | -0.0068            | -0.0103          | -0.0105            | 0.1088           | 0.1089             | 0.3293           | 0.3292             | 1                |                    |                  |                    |                  |                    |  |
| $P_{West_{t-3}}^2$ | -0.0134          | -0.0132            | -0.0155          | -0.0156            | -0.0056          | -0.0058            | -0.0054          | -0.0069            | -0.0104          | -0.0106            | 0.1089           | 0.1091             | 0.3294           | 0.3294             | 0.9999           | 1                  |                  |                    |                  |                    |  |
| $P_{West_{t-4}}$   | -0.0199          | -0.0181            | -0.0135          | -0.0133            | -0.0154          | -0.0155            | -0.0053          | -0.0056            | -0.0051          | -0.0067            | 0.0608           | 0.0612             | 0.1089           | 0.109              | 0.3295           | 0.3294             | 1                |                    |                  |                    |  |
| $P_{West_{t-4}}^2$ | -0.0196          | -0.0178            | -0.0134          | -0.0132            | -0.0154          | -0.0155            | -0.0055          | -0.0057            | -0.0053          | -0.0068            | 0.0611           | 0.0615             | 0.1091           | 0.1092             | 0.3296           | 0.3296             | 0.9999           | 1                  |                  |                    |  |
| $P_{West_{t-5}}$   | 0.0033           | 0.0039             | -0.0197          | -0.0179            | -0.0135          | -0.0133            | -0.0154          | -0.0155            | -0.0053          | -0.0055            | 0.0158           | 0.016              | 0.0605           | 0.0608             | 0.1087           | 0.1088             | 0.3292           | 0.3291             | 1                |                    |  |
| $P_{West_{t-5}}^2$ | 0.0036           | 0.0042             | -0.0195          | -0.0177            | -0.0134          | -0.0132            | -0.0154          | -0.0155            | -0.0055          | -0.0057            | 0.0161           | 0.0163             | 0.0608           | 0.0612             | 0.1088           | 0.109              | 0.3293           | 0.3292             | 0.9999           | 1                  |  |

## Price Differential Regressions with Additional Latency Lags

In this set of results, we add additional latency lags as a further specification robustness check. The results reported below further confirm the significance of latency differentials on west-east price differentials. The additional lags influence the magnitude of the coefficient estimates as it spreads the effects across the coefficient lags, but it does not affect our inferences or overall measured impacts.

|               | Windows           |                    | Linux/Unix         |                   |
|---------------|-------------------|--------------------|--------------------|-------------------|
|               | Model 1           | Model 2            | Model 1            | Model 2           |
| DLEast        | 7.83<br>(<.0001)  | 6.79<br>(<.0001)   | 4.41<br>(<.0001)   | 3.97<br>(<.0001)  |
| DLWest        | 4.43<br>(<.0001)  | 3.86<br>(<.0001)   | 2.66<br>(<.0001)   | 2.38<br>(<.0001)  |
| DLCentral     | 0.390<br>(0.0074) | 0.128<br>(0.3852)  | -0.322<br>(0.2045) | 0.251<br>(0.3372) |
| Lag_DLEast    | 8.28<br>(<.0001)  | 7.25<br>(<.0001)   | 4.55<br>(<.0001)   | 4.11<br>(<.0001)  |
| Lag_DLWest    | 4.50<br>(<.0001)  | 3.93<br>(<.0001)   | 2.88<br>(<.0001)   | 2.61<br>(<.0001)  |
| Lag_DLCentral | 0.235<br>(0.1063) | -0.026<br>(0.8619) | -0.360<br>(0.1555) | 0.216<br>(0.4088) |
| Micro         |                   | 2.30<br>(0.2205)   |                    | 10.26<br>(0.0021) |
| Singapore     |                   | 22.93<br>(<.0001)  |                    | -2.67<br>(0.2016) |
| CC            |                   | -3.14<br>(0.0007)  |                    | 8.91<br>(<.0001)  |
| Free          |                   | -1.59<br>(0.1905)  |                    | -1.06<br>(0.6222) |
| CG            |                   | 6.33<br>(<.0001)   |                    | 0.640<br>(0.7356) |
| Reduced       |                   | -6.42<br>(0.0005)  |                    | -6.95<br>(0.0341) |
| Tokyo         |                   | -5.92<br>(<.0001)  |                    | -1.67<br>(0.1949) |
| Obs           | 9816              | 9816               | 9816               | 9816              |

## Alternative ECM Specification

In this set of results, we provide an additional specification test for our ECM model whereby we include additional price lags in the ECM framework. The results reported below further confirm the significance of latency differentials on west-east price differentials as well as the estimated partial speed of adjustment.

Panel A: Stage 1,  $P_t^{West} = \beta_0 + \beta_1 P_t^{East} + \nu_t$

| Variable                | Parameter<br>Estimate | Pr >  t |
|-------------------------|-----------------------|---------|
| Intercept               | 0.531                 | <.0001  |
| <i>P<sup>East</sup></i> | 3.200                 | 0.7826  |

Panel B: Stage 2,  $PD_t = \alpha_0 + \sum_{i=1}^n \alpha_i \Delta X_{it} - \gamma \hat{\nu}_{t-1} + \varepsilon_t$ ,

| Variable              | Parameter<br>Estimate | Pr >  t |
|-----------------------|-----------------------|---------|
| Lag(pd)               | 0.504                 | <.0001  |
| Lag2(pd)              | 0.103                 | <.0001  |
| DL <sup>East</sup>    | 2.48                  | <.0001  |
| DL <sup>West</sup>    | 1.33                  | <.0001  |
| DL <sup>Central</sup> | 0.085                 | 0.4144  |
| lagres                | -0.692                | <.0001  |
